# Supplementary material
Source: PubMed Central journal article supplement (PMC9072586)
Supplement: mmc1.pdf [file mmc1.pdf]

**Biophysical Journal, Volume 121**

**Supplemental information**

**Oscillations in K(ATP) conductance drive slow calcium oscillations in  
pancreatic  $\beta$ -cells**

**Isabella Marinelli, Benjamin M. Thompson, Vishal S. Parekh, Patrick A. Fletcher, Luca  
Gerardo-Giorda, Arthur S. Sherman, Leslie S. Satin, and Richard Bertram**

# Oscillations in K(ATP) Conductance Drive Slow Calcium Oscillations in Pancreatic $\beta$ -Cells

Isabella Marinelli<sup>\*1</sup>, Benjamin M. Thompson<sup>\*2</sup>, Vishal S. Parekh<sup>3</sup>, Patrick A. Fletcher<sup>4</sup>, Luca Gerardo-Giorda<sup>5,6</sup>, Arthur S. Sherman<sup>4</sup>, Leslie S. Satin<sup>2</sup>, Richard Bertram<sup>7</sup>

<sup>1</sup> Centre for Systems Modelling & Quantitative Biomedicine (SMQB), University of Birmingham, Birmingham, UK; <sup>2</sup> Department of Pharmacology and Brehm Center for Diabetes Research, University of Michigan Medical School, Ann Arbor, Michigan; <sup>3</sup> Chemical Biology and Therapeutics Science Program, Broad Institute, Cambridge, Massachusetts; <sup>4</sup> Laboratory of Biological Modeling, National Institutes of Health, Bethesda, Maryland; <sup>5</sup> Institute for Mathematical Methods in Medicine and Data Based Modeling, Johannes Kepler University, Linz, Austria; <sup>6</sup> Johann Radon Institute for Computational and Applied Mathematics (RICAM), Austrian Academy of Sciences, Linz, Austria; <sup>7</sup> Department of Mathematics and Programs in Neuroscience and Molecular Biophysics, Florida State University, Tallahassee, Florida

\*These authors contributed equally

## Supporting Material

### 1. Linear mixed effects modelling

To quantify the steepness and the direction of change in measured Perceval-HR fluorescence ratio of the three experiments described in Figs. 7, 8, and 9 in the main text, we employ a linear mixed-effects model (MATLAB function `fitlme`) to estimate the slope of the traces corresponding to each measurement.

We label the experiments described in Figs. 7, 8, and 9 as Experiment [1], Experiment [2], and Experiment [3], respectively. In each experimental set up, the measurements are recorded from several islets belonging to different mice. Therefore, we employ linear mixed-effects modeling to handle the hierarchical structure in the data resulting from the non-independence of islets from the same mouse and the variability due to unknown factors, such as Perceval-HR expression level, among islets. The response variable of interest is thus modelled as a function of predictors (time and experiment) that were treated as fixed effects, whereas the variance shared among hierarchical groupings (mice and islets) were treated as random effects. In our analysis, the response variable of interest is the Perceval-HR fluorescence ratio, the predictor variables are Time (in minutes) and Experiment (which identifies each of the three experiments), while the random effects are due to the Islet and Mouse corresponding to the recording. The resulting linear mixed-effects model is described by the model formula:

$$\text{Ratio (493/403)} \sim \text{Time} * \text{Experiment} + (1|\text{Islet}) + (1|\text{Mouse}).$$

The term  $\text{Time} * \text{Experiment}$  represents the interaction of Time and Experiment, and thus reports the variation in slope for each experimental condition.

The goal of our statistical analysis is to assess whether the slope is null in Fig. 7 (when the  $\beta$ -cell is bursting), positive in Fig. 8 (in diazoxide) and negative in Fig. 9 (in diazoxide and high KCl). As a control for drift possibly due to photobleaching, we recorded the Perceval-HR fluorescence ratio at 5 mM glucose, where  $\beta$ -cells are expected to be silent. Panel A in Fig. S1 illustrates the measurements, where each panel corresponds to an experiment from a different mouse and each trace to a different islet. This experiment is labelled as Experiment [0], and the estimated slope is used as a reference to judge whether the slope in the other experiments is null, positive, or negative.

Table S1 summarizes the results of the linear regression, while Fig. S1 illustrates the recordings organized by experiment and with the model regression lines superimposed on the data. The reference slope (Experiment [0]) is given by the value *Estimate* corresponding to the predictor Time. The slope is numerically very small and statistically not different from 0 (*p-value* = 0.1). The value of *Estimate* corresponding to the term Time:Experiment [x] (where x is either 1, 2, or 3) represents the deviation from the reference of the estimated slope for Experiment x as a function of Time. Therefore, if Time:Experiment [x] is positive, Ratio (492/403) increases with time relative to the reference for the recordings in Experiment x, while if it is negative it decreases.

The slope in Experiment [1] (corresponding to Fig. 7) is not statistically different from the reference value (*p-value* = 0.6), and therefore, there are no statistically significant changes in ATP/ADP over time. In contrast, the slopes for Experiment [2] (Fig. 8) and Experiment [3] (Fig. 9) are statistically different from the baseline with positive (*estimation* = 0.0021 min<sup>-1</sup>, *p-value* < 0.001) and negative (*estimation* = -0.0033 min<sup>-1</sup>, *p-value* < 0.001) slope, respectively. Thus, the Ratio (492/403) increases with time in Fig. 8 and decreases with time in Fig. 9.

The result of the statistical analysis confirms that if the  $\beta$ -cell is bursting, we do not observe any systematic increase in ATP/ADP as glucose is increased (Fig. 7), but an increase is observed when the  $\beta$ -cell is not bursting (Fig. 8). Finally, ATP/ADP declines if the  $\beta$ -cell is silent and the ATP consumption is increased (Fig. 9).

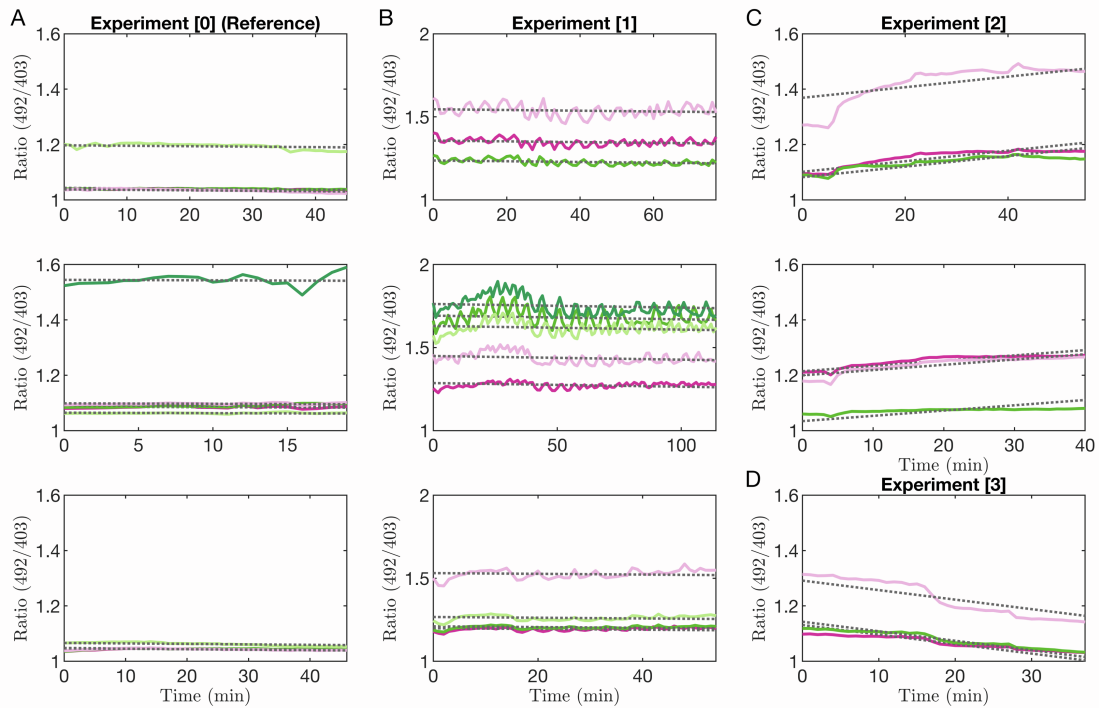

Figure S1: Measurement of Perceval-HR fluorescence ratio and fitted lines (gray). Experiments in which (A) glucose is kept at 5 mM (Experiment [0]); (B) glucose concentration is increased in steps from 9 mM to 13 mM (Experiment [1], Fig. 7); (C) islets were exposed to Dz (200  $\mu$ M) and KCl (30 mM) and glucose was increased in steps from 5 mM to 13 mM (Experiment [2], Fig. 8); (D) islets were exposed to Dz (200  $\mu$ M) and 5 mM glucose, and the KCl concentration was increased in steps from 5 mM to 30 mM (Experiment [3], Fig. 9). Each panel corresponds to a different experiment from a Swiss-Webster mouse and each trace to a different islet.

| <b>Ratio (492/403)</b> |                 |                     |                  |
|------------------------|-----------------|---------------------|------------------|
| <i>Predictors</i>      | <i>Estimate</i> | <i>CI</i>           | <i>p-value</i>   |
| (Intercept)            | 1.11            | [1.02, 1.19]        | <b>&lt;0.001</b> |
| Time                   | -0.0002         | [-0.000361, 3-05]   | 0.10             |
| Experiment [1]         | 0.32            | [0.19, 0.45]        | <b>&lt;0.001</b> |
| Experiment [2]         | 0.059           | [-0.094, 0.212]     | 0.45             |
| Experiment [3]         | 0.081           | [-0.117, 0.279]     | 0.42             |
| Time:Experiment [1]    | -5e-05          | [-0.00026, 0.00015] | 0.60             |
| Time:Experiment [2]    | 0.0021          | [0.0018, 0.0024]    | <b>&lt;0.001</b> |
| Time:Experiment [3]    | -0.0033         | [-0.0037, -0.0028]  | <b>&lt;0.001</b> |

  

| <b>Random effects covariance parameters (95% CIs):</b> |                 |                  |
|--------------------------------------------------------|-----------------|------------------|
| <i>Name</i>                                            | <i>Estimate</i> | <i>CI</i>        |
| $\sigma^2$                                             | 0.0265          | [0.0256, 0.0273] |
| $\tau_{00}$                                            | 0.144 (Islet)   | [0.111, 0.189]   |
|                                                        | 0.0348 (Mouse)  | [0.0030, 0.4005] |

  

|              |          |
|--------------|----------|
| N            | 34 Islet |
|              | 9 Mouse  |
| Observations | 1906     |

Table S1. Summary of the linear mixed-effects modelling of Measurement of Perceval-HR fluorescence ratio. The model formula is: Ratio (493/403) ~ Time \* Experiment + (1|Islet) + (1|Mouse). Estimates, 95% confidence intervals, and p-value (bold, *p-value* <0.001) for each predictor of Ratio (493/403) are shown.  $\sigma^2$ , mean variance of random effects;  $\tau_{00}$ , random intercept variance (between subject variance) for each random effect; N, number of groups per random effect; Observations, total number of recordings of islets in any combination of fixed effects.

## 2. Linear mixed effects modelling: mean, amplitude, peaks, and nadirs

To test the invariance of ATP/ADP mean, amplitude, peak, and nadir values of Perceval-HR fluorescence ratio oscillations with changes in the stimulatory glucose concentration (Fig. 7, Experiment [1]), we again use a linear mixed-effects model. The predictor variable is now glucose, and the resulting model formula is:

$$Response \sim Glucose + (1|Islet) + (1|Mouse)$$

where the variables *Response* represents the value of the mean, amplitude, peaks, or nadirs of ATP/ADP (see Fig. S2).

Tables S2, S3, S4 and S5 summarize the results of the linear regression done using the MATLAB function `fitlme`, for mean, amplitude, peak, and nadir values, respectively. In the experimental set up, the islets are initially silent ( $G = 5$  mM) and enter the bursting regime when the level of glucose is increased to 9 mM. Analysis is then performed on the data following an initial transition period. We identify this moment as the point in time when the oscillation period reaches 75% of the (mean) period observed in 11 mM and 13 mM. The analysis showed no significant impact of changes in glucose in the mean, nadir, or amplitude of oscillations. There was a small, but significant, decline in the oscillation peak as a function of glucose (with *p-value* = 0.0044).

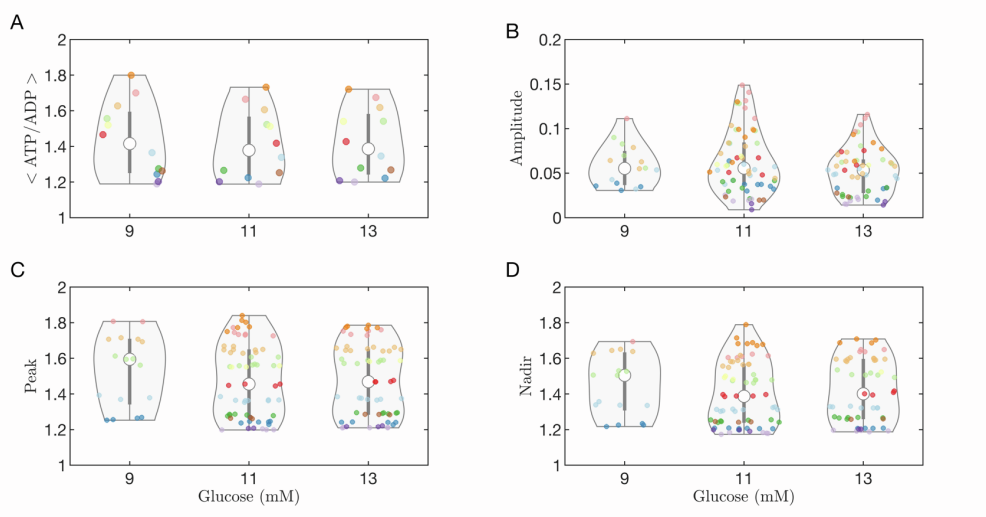

Figure S2: Perceval-HR fluorescence ratio values of mean (A), amplitude (B), peaks (C), and nadirs (D) for different values of glucose. Each islet is identified by a different color.

| <b>Mean</b>       |                 |                   |                  |
|-------------------|-----------------|-------------------|------------------|
| <i>Predictors</i> | <i>Estimate</i> | <i>CI</i>         | <i>p-value</i>   |
| (Intercept)       | 1.452           | [1.311, 1.593]    | <b>&lt;0.001</b> |
| Glucose           | -0.00339        | [-0.00685, 7e-05] | 0.055            |

  

| <b>Random effects covariance parameters (95% CIs):</b> |                 |                |  |
|--------------------------------------------------------|-----------------|----------------|--|
| <i>Name</i>                                            | <i>Estimate</i> | <i>CI</i>      |  |
| $\sigma^2$                                             | 0.017           | [0.013, 0.022] |  |
| $\tau_{00}$                                            | 0.171 (Islet)   | [0.109, 0.270] |  |
|                                                        | 0.076 (Mouse)   | [0.013, 0.451] |  |

  

|              |          |
|--------------|----------|
| N            | 12 Islet |
|              | 3 Mouse  |
| Observations | 36       |

Table S2. Summary of the linear mixed-effects modelling of the mean of Perceval-HR fluorescence ratio. The model formula is: Mean  $\sim$  Glucose + (1|Islet) + (1|Mouse). Estimates, 95% confidence intervals, and p-value (bold, *p-value* <0.05) for each predictor of Mean are shown.  $\sigma^2$ , mean variance of random effects;  $\tau_{00}$ , random intercept variance (between subject variance) for each random effect; N, number of groups per random effect; Observations, total number of recordings of islets in any combination of fixed effects.



| <b>Amplitude</b>  |                 |                     |                  |
|-------------------|-----------------|---------------------|------------------|
| <i>Predictors</i> | <i>Estimate</i> | <i>CI</i>           | <i>p-value</i>   |
| (Intercept)       | 0.072           | [0.042, 0.103]      | <b>&lt;0.001</b> |
| Glucose           | -0.00164        | [-0.00353, 0.00024] | 0.086            |

  

| <b>Random effects covariance parameters (95% CIs):</b> |                 |                |  |
|--------------------------------------------------------|-----------------|----------------|--|
| <i>Name</i>                                            | <i>Estimate</i> | <i>CI</i>      |  |
| $\sigma^2$                                             | 0.014           | [0.013, 0.016] |  |
| $\tau_{00}$                                            | 0.027 (Islet)   | [0.017, 0.043] |  |
|                                                        | 0.012 (Mouse)   | [0.002, 0.070] |  |

  

|              |          |
|--------------|----------|
| N            | 12 Islet |
|              | 3 Mouse  |
| Observations | 135      |

Table S3. Summary of the linear mixed-effects modelling of the amplitude of Perceval-HR fluorescence ratio oscillations. The model formula is: Amplitude  $\sim$  Glucose + (1|Islet) + (1|Mouse). Estimates, 95% confidence intervals, and p-value (bold, *p-value* <0.05) for each predictor of Mean are shown.  $\sigma^2$ , mean variance of random effects;  $\tau_{00}$ , random intercept variance (between subject variance) for each random effect; N, number of groups per random effect; Observations, total number of recordings of islets in any combination of fixed effects.

| <b>Peak</b>       |                 |                      |                  |
|-------------------|-----------------|----------------------|------------------|
| <i>Predictors</i> | <i>Estimate</i> | <i>CI</i>            | <i>p-value</i>   |
| (Intercept)       | 1.481           | [1.338, 1.624]       | <b>&lt;0.001</b> |
| Glucose           | -0.00322        | [-0.00541, -0.00102] | <b>0.0044</b>    |

  

| <b>Random effects covariance parameters (95% CIs):</b> |                 |                |  |
|--------------------------------------------------------|-----------------|----------------|--|
| <i>Name</i>                                            | <i>Estimate</i> | <i>CI</i>      |  |
| $\sigma^2$                                             | 0.017           | [0.015, 0.020] |  |
| $\tau_{00}$                                            | 0.186 (Islet)   | [0.118, 0.293] |  |
|                                                        | 0.080 (Mouse)   | [0.013, 0.507] |  |

  

|              |          |
|--------------|----------|
| N            | 12 Islet |
|              | 3 Mouse  |
| Observations | 145      |

Table S4. Summary of the linear mixed-effects modelling of the peaks of the Perceval-HR fluorescence ratio oscillations. The model formula is: Peak ~ Glucose + (1|Islet) + (1|Mouse). Estimates, 95% confidence intervals, and p-value (bold, *p-value* <0.05) for each predictor of Mean are shown.  $\sigma^2$ , mean variance of random effects;  $\tau_{00}$ , random intercept variance (between subject variance) for each random effect; N, number of groups per random effect; Observations, total number of recordings of islets in any combination of fixed effects.

| <b>Nadir</b>      |                 |                     |                  |
|-------------------|-----------------|---------------------|------------------|
| <i>Predictors</i> | <i>Estimate</i> | <i>CI</i>           | <i>p-value</i>   |
| (Intercept)       | 1.408           | [1.283, 1.532]      | <b>&lt;0.001</b> |
| Glucose           | -0.00158        | [-0.00412, 0.00095] | 0.219            |

**Random effects covariance parameters (95% CIs):**

| <i>Name</i> | <i>Estimate</i> | <i>CI</i>      |
|-------------|-----------------|----------------|
| $\sigma^2$  | 0.020           | [0.017, 0.022] |
| $\tau_{00}$ | 0.161 (Islet)   | [0.3, 0.254]   |
|             | 0.068 (Mouse)   | [0.010, 0.448] |

|              |          |
|--------------|----------|
| N            | 12 Islet |
|              | 3 Mouse  |
| Observations | 142      |

Table S5. Summary of the linear mixed-effects modelling of the nadirs of the Perceval-HR fluorescence ratio oscillations. The model formula is: Nadir ~ Glucose + (1|Islet) + (1|Mouse). Estimates, 95% confidence intervals, and p-value (bold, *p-value* <0.05) for each predictor of Mean are shown.  $\sigma^2$ , mean variance of random effects;  $\tau_{00}$ , random intercept variance (between subject variance) for each random effect; N, number of groups per random effect; Observations, total number of recordings of islets in any combination of fixed effects.

### 3. The Integrated Oscillator Model: equations and parameters

The first module in the Integrated Oscillator Model (IOM) describes the cellular electrical activity and intracellular  $\text{Ca}^{2+}$  dynamics. The second module describes the components of the metabolic pathway included in our model: glycolysis and mitochondrial metabolism.

#### *The electrical and calcium module*

The rate of change of the cellular membrane potential,  $V_M$ , is expressed by

$$\frac{dV_M}{dt} = \frac{1}{C} [I_{\text{Ca}} + I_{\text{K(Ca)}} + I_{\text{K(ATP)}} + I_{\text{K}}], \quad (\text{S1})$$

where  $C$  is the membrane capacitance,  $I_{\text{Ca}}$  is the  $V_M$ -dependent  $\text{Ca}^{2+}$  current,  $I_{\text{K(Ca)}}$  is the  $\text{Ca}^{2+}$ -activated  $\text{K}^+$  current,  $I_{\text{K(ATP)}}$  is the ATP-dependent  $\text{K}^+$  current, and  $I_{\text{K}}$  is the delayed-rectifying  $\text{K}^+$  current:

$$I_{\text{Ca}} = g_{\text{Ca}} m_{\infty}(V_M)(V_M - V_{\text{Ca}}), \quad (\text{S2})$$

$$I_{\text{K(Ca)}} = g_{\text{K(Ca)}} q_{\infty}(c)(V_M - V_{\text{K}}), \quad (\text{S3})$$

$$I_{\text{K(ATP)}} = g_{\text{K(ATP)}} o_{\infty}(\text{ADP}, \text{ATP})(V_M - V_{\text{K}}), \quad (\text{S4})$$

$$I_{\text{K}} = g_{\text{K}} n(V_M - V_{\text{K}}). \quad (\text{S5})$$

The upstroke and downstroke of action potentials are mediated by  $I_{\text{Ca}}$  and  $I_{\text{K}}$ , respectively. The  $\text{K(Ca)}$  and  $\text{K(ATP)}$  currents are involved in clustering action potentials into bursts.

The activation functions for  $I_{\text{Ca}}$ ,  $I_{\text{K(Ca)}}$ , and  $I_{\text{K(ATP)}}$  are given by

$$m_{\infty}(V_M) = \frac{1}{1 + \exp[(v_m - V_M)/s_m]}, \quad (\text{S6})$$

$$q_{\infty}(Ca) = \frac{Ca^2}{k_d^2 + Ca^2}, \quad (\text{S7})$$

$$o_{\infty}(\text{ADP}, \text{ATP}) = \frac{0.08 + 0.89 \left(\frac{\text{MgADP}}{k_{dd}}\right)^2 + 0.16 \left(\frac{\text{MgADP}}{k_{dd}}\right)}{\left(1 + \frac{\text{MgADP}}{k_{dd}}\right)^2 \left(1 + \frac{\text{ATP}^{4-}}{k_{tt}} + \frac{\text{ADP}^{3-}}{k_{td}}\right)}, \quad (\text{S8})$$

with  $\text{MgADP} = 0.165 \text{ ADP}$ ,  $\text{ATP}^{4-} = 0.05 \text{ ATP}$ , and  $\text{ADP}^{3-} = 0.135 \text{ ADP}$ . The parameters of this module are given in Table S6.

The activation variable for the delayed-rectifying  $\text{K}^+$  current,  $n$ , is given by

$$\frac{dn}{dt} = \frac{n_{\infty}(V_M) - n}{\tau_n} , \quad (\text{S9})$$

where

$$n_{\infty}(V_M) = \frac{1}{1 + \exp[(v_n - V_M)/s_n]} . \quad (\text{S10})$$

The dynamics of the free  $\text{Ca}^{2+}$  concentration in the cytosol,  $Ca$ , in the mitochondria,  $Ca_m$ , and in endoplasmic reticulum (ER),  $Ca_{er}$ , are given by

$$\begin{aligned} \frac{dCa}{dt} &= f_{Ca}(J_{\text{mem}} - J_{er} - J_m) , \\ \frac{dCa_m}{dt} &= f_{Ca}\sigma_m J_m , \\ \frac{dCa_{er}}{dt} &= f_{Ca}\sigma_{er} J_{er} , \end{aligned} \quad (\text{S11})$$

Here,  $f_{Ca}$  is the fraction of  $\text{Ca}^{2+}$  ions not bound to buffers, and  $J_{\text{mem}}$ ,  $J_m$ , and  $J_{er}$  represent the  $\text{Ca}^{2+}$  flux densities across the plasma membrane, into the mitochondria, and into the ER, respectively:

$$J_{\text{mem}} = - \left[ \frac{\alpha}{V_{\text{cyt}}} I_{Ca} + k_{\text{PMCA}} Ca \right] , \quad (\text{S12})$$

$$J_{er} = k_{\text{SERCA}} Ca - k_{\text{NaCa}} (Ca_m - Ca) , \quad (\text{S13})$$

$$J_m = J_{\text{uni}} - J_{\text{NaCa}} . \quad (\text{S14})$$

The terms  $J_{\text{uni}}$  and  $J_{\text{NaCa}}$  represent the flux through the  $\text{Ca}^{2+}$  pumps and through the  $\text{Na}^+/\text{Ca}^{2+}$  exchanger, respectively:

$$J_{\text{uni}} = (p_{21}\psi_m - p_{22})Ca^2 , \quad (\text{S15})$$

$$J_{\text{NaCa}} = p_{21}(Ca_m - Ca)\exp(p_{24}\psi_m) . \quad (\text{S16})$$

| Parameter    | Value    | Parameter | Value             | Parameter          | Value                                                               |
|--------------|----------|-----------|-------------------|--------------------|---------------------------------------------------------------------|
| C            | 5300 fF  | $k_d$     | 0.5 $\mu\text{M}$ | $\sigma_{er}$      | 31                                                                  |
| $g_{Ca}$     | 1000 pS  | $k_{da}$  | 17 $\mu\text{M}$  | $\alpha$           | 5.18<br>$\times 10^{-18} \mu\text{mol}fA \cdot$<br>$\text{ms}^{-1}$ |
| $g_{K(Ca)}$  | 150 pS   | $k_{tt}$  | 1 $\mu\text{M}$   | $V_{\text{cyt}}$   | $1.15 \times 10^{-12} \text{l}$                                     |
| $g_{K(ATP)}$ | 19700 pS | $k_{td}$  | 26 $\mu\text{M}$  | $k_{\text{PMCA}}$  | 0.2 $\text{ms}^{-1}$                                                |
| $g_K$        | 2700 pS  | $\tau_n$  | 20 ms             | $k_{\text{SERCA}}$ | 0.4 $\text{ms}^{-1}$                                                |
| $V_{Ca}$     | 25 mV    | $v_n$     | -16 mV            | $p_{21}$           | 0.013 $\mu\text{M}^{-1}$<br>$\text{ms}^{-1}\text{mV}^{-1}$          |

|       |        |                 |      |          |                                       |
|-------|--------|-----------------|------|----------|---------------------------------------|
| $V_K$ | -75 mV | $s_n$           | 5mV  | $p_{22}$ | $1.6 \mu\text{M}^{-1} \text{ms}^{-1}$ |
| $v_m$ | -20 mV | $f_{\text{Ca}}$ | 0.01 | $p_{23}$ | $0.0015 \mu\text{M} \text{ms}^{-1}$   |
| $s_m$ | 12 mV  | $\sigma_m$      | 290  | $p_{24}$ | $0.016 \text{mV}^{-1}$                |

Table S6. Parameter values for the electrical and calcium module.

### The metabolic module

The cytosolic concentrations of F6P and FBP are described by

$$\frac{d\text{F6P}}{dt} = 0.3(J_{\text{GK}} - J_{\text{PFK}}), \quad (\text{S17})$$

$$\frac{d\text{FBP}}{dt} = J_{\text{PFK}} - \frac{1}{2} \frac{J_{\text{PDH}}}{\sigma_m}, \quad (\text{S18})$$

where  $J_{\text{GK}}$  is the glucose-dependent glucokinase (GK) reaction rate,  $J_{\text{PFK}}$  is the phosphofructokinase (PFK) reaction rate, and  $J_{\text{PDH}}$  is the pyruvate dehydrogenase (PDH) reaction rate. Fluxes through GK, PFK, and PDH are described by

$$J_{\text{GK}} = v_{\text{GK}} \frac{G^2}{K_{\text{GK}}^2 + G^2}, \quad (\text{S19})$$

$$J_{\text{PFK}} = v_{\text{PFK}} \frac{w_{1110} + k_{\text{PFK}} \sum_{i,j,l \in \{0,1\}} w_{ij1l}}{\sum_{i,j,k,l \in \{0,1\}} w_{ijkl}} \quad (\text{S20})$$

$$J_{\text{PDH}} = v_{\text{PDH}} \frac{1}{K_{\text{NADH}_m, \text{PDH}} + \frac{\text{NADH}_m}{\text{NAD}_m}} J_{\text{GPDH}}, \quad (\text{S21})$$

where  $G$  is the glucose concentration and the weights  $w_{ijkl}$

$$w_{ijkl} = \frac{\left(\frac{\text{AMP}}{K_1}\right)^i \left(\frac{\text{FBP}}{K_2}\right)^j \left(\frac{\text{F6P}^2}{K_3}\right)^k \left(\frac{\text{ATP}^2}{K_4}\right)^l}{f_{13}^{ik} f_{23}^{jk} f_{41}^{il} f_{42}^{jl} f_{43}^{kl}}. \quad (\text{S22})$$

The glycerol-3-phosphate dehydrogenase (GPDH) reaction rate,  $J_{\text{GPDH}}$ , is

$$J_{\text{GPDH}} = \frac{Ca_m}{K_{\text{GPDH}} + Ca_m} \sqrt{\text{FBP}}. \quad (\text{S23})$$

The adenosine diphosphate (ADP) dynamics are given by

$$\frac{dADP}{dt} = J_{\text{hyd}} - \frac{J_{\text{ANT}}}{\sigma_m} , \quad (\text{S24})$$

where  $J_{\text{hyd}}$  reflects ATP hydrolysis and  $J_{\text{ANT}}$  is the flux of ATP produced in the mitochondria and transported to the cytosol through the adenine nucleotide translocator (ANT),

$$J_{\text{hyd}} = (k_{\text{hyd}}Ca + k_{\text{hyd,bas}})ATP , \quad (\text{S25})$$

$$J_{\text{ANT}} = p_{19} \frac{\frac{ATP_m}{ADP_m}}{\frac{ATP_m}{ADP_m} + p_{20}} \exp\left(\frac{F}{2RT} \psi_m\right) . \quad (\text{S26})$$

The hydrolysis term has a  $\text{Ca}^{2+}$ -independent term that represents ATP hydrolysis for cell homeostasis, and a  $\text{Ca}^{2+}$ -dependent term that represents hydrolysis by  $\text{Ca}^{2+}$  pumps present on the plasma and ER membranes.

The model assumes that the total nucleotide concentrations in the cytosol and in the mitochondria ( $A_{\text{tot}}$  and  $A_{\text{tot,m}}$ , respectively) is constant, and that the sum of both cytosolic and mitochondrial nucleotides are conserved:

$$ATP = \frac{1}{2} \left[ A_{\text{tot}} + \sqrt{-4ADP^2 + (A_{\text{tot}} - ADP)^2} - ADP \right] , \quad (\text{S27})$$

$$ATP_m = A_{\text{tot,m}} - ADP_m . \quad (\text{S28})$$

There are two terms for NADH production: production due to pyruvate dehydrogenase ( $J_{\text{PDH}}$ ), and production due to the combined action of dehydrogenases in the citric acid cycle ( $J_{\text{DH}}$ ). The mitochondrial concentration of NADH is then

$$\frac{d\text{NADH}_m}{dt} = J_{\text{PDH}} + J_{\text{DH}} - J_O , \quad (\text{S29})$$

where  $J_{\text{PDH}}$  is given by (S21) and  $J_{\text{DH}}$  and the oxygen consumption rate ( $J_O$ ) are:

$$J_{\text{DH}} = v_{\text{DH}} \frac{Ca_m}{K_{\text{DH}} + Ca_m} \frac{1}{K_{\text{NADH}_m, \text{DH}} + \frac{\text{NADH}_m}{\text{NAD}_m}} , \quad (\text{S30})$$

$$J_O = p_4 \frac{\text{NADH}_m}{p_5 + \text{NADH}_m} \frac{1}{1 + \exp\left(\frac{\psi_m - p_6}{p_7}\right)} . \quad (\text{S31})$$

The model assumes nucleotide conservation:

$$\text{NAD}_m = N_{\text{tot,m}} - \text{NADH}_m , \quad (\text{S32})$$

where  $N_{\text{tot,m}}$  is the total concentration in the mitochondria.

The changes in the dynamics of the mitochondrial membrane potential,  $\psi_m$ , are described by

$$\frac{d\psi_m}{dt} = \frac{1}{C_m} [J_{\text{Hres}} - J_{\text{Hatp}} - J_{\text{Hleak}} - J_{\text{ANT}} - J_{\text{NaCa}} - 2J_{\text{uni}}] . \quad (\text{S33})$$

Here,  $C_m$  is the mitochondrial inner membrane capacitance,  $J_{\text{Hres}}$  is the flux through respiration-driven proton pumps,  $J_{\text{Hatp}}$  is the proton flux entering the mitochondria through the ATPase, while  $J_{\text{Hleak}}$  is the proton flux entering the mitochondria through leakage down the proton gradient:

$$J_{\text{Hres}} = p_8 \frac{\text{NADH}_m}{p_9 + \text{NADH}_m} \frac{1}{1 + \exp\left(\frac{\psi_m - p_{10}}{p_{11}}\right)} , \quad (\text{S34})$$

$$J_{\text{Hatp}} = 3J_{\text{F1F0}} , \quad (\text{S35})$$

$$J_{\text{Hleak}} = p_{17}\psi_m - p_{18} . \quad (\text{S36})$$

The term  $J_{\text{F1F0}}$  in (S35) is the rate at which the F1F0 ATP synthase phosphorylates ADP to form ATP:

$$J_{\text{F1F0}} = p_{16} \frac{p_{13}}{p_{13} + \text{ADP}_m} \frac{1}{1 + \exp\left(\frac{p_{14} - \psi_m}{p_{15}}\right)} . \quad (\text{S37})$$

Since mitochondrial ATP production comes at the expense of ADP, the mitochondrial ADP level ( $\text{ADP}_m$ ) is given by

$$\frac{d\text{ADP}_m}{dt} = J_{\text{ANT}} - J_{\text{F1F0}} , \quad (\text{S38})$$

with  $J_{\text{ANT}}$  and  $J_{\text{F1F0}}$  given in (S26) and (S37), respectively.

Parameter values for the metabolic module are given in Table S7.



| Parameter        | Value                         | Parameter                       | Value                                      | Parameter           | Value                                       |
|------------------|-------------------------------|---------------------------------|--------------------------------------------|---------------------|---------------------------------------------|
| $J_{GK}$         | $0.001 \mu\text{M ms}^{-1}$   | $K_{\text{NADH}_m, \text{PDH}}$ | 1.3                                        | $p_{11}$            | 5 mV                                        |
| $v_{GK}$         | $0.0037 \mu\text{M ms}^{-1}$  | $K_{\text{GPDH}}$               | $1.5 \mu\text{M}$                          | $p_{13}$            | $10000 \mu\text{M}$                         |
| $K_{GK}$         | 19mM                          | $k_{\text{hyd}}$                | $1.864 \times 10^{-6} \mu\text{M ms}^{-1}$ | $p_{14}$            | 190 mV                                      |
| $v_{\text{PFK}}$ | $0.01 \mu\text{M ms}^{-1}$    | $k_{\text{hyd, bas}}$           | $6.48 \times 10^{-7} \mu\text{M ms}^{-1}$  | $p_{15}$            | 8.5 mV                                      |
| $k_{\text{PFK}}$ | 0.06                          | $v_{\text{DH}}$                 | $1.1 \mu\text{M ms}^{-1}$                  | $p_{16}$            | $4 \mu\text{M ms}^{-1}$                     |
| $K_1$            | $30 \mu\text{M}$              | $K_{\text{NADH}_m, \text{DH}}$  | 1.3                                        | $p_{17}$            | $0.0014 \mu\text{M ms}^{-1} \text{mV}^{-1}$ |
| $K_2$            | $1 \mu\text{M}$               | $K_{\text{DH}}$                 | $0.8 \mu\text{M}$                          | $p_{18}$            | $0.02 \mu\text{M ms}^{-1}$                  |
| $K_3$            | $5 \times 10^4 \mu\text{M}^2$ | $\frac{F}{2RT}$                 | 0.037                                      | $p_{19}$            | $0.6 \mu\text{M ms}^{-1}$                   |
| $K_4$            | $1000 \mu\text{M}^2$          | $p_4$                           | $0.55 \mu\text{M ms}^{-1}$                 | $p_{20}$            | 2                                           |
| $f_{13}$         | 0.02                          | $p_5$                           | $250 \mu\text{M}$                          | $A_{\text{tot}}$    | $3000 \mu\text{M}$                          |
| $f_{23}$         | 0.2                           | $p_6$                           | 165 mV                                     | $A_{\text{tot}, m}$ | $15000 \mu\text{M}$                         |
| $f_{41}$         | 20                            | $p_7$                           | 5mV                                        | $N_{\text{tot}, m}$ | $10000 \mu\text{M}$                         |
| $f_{42}$         | 20                            | $p_8$                           | $7.4 \mu\text{M ms}^{-1}$                  | $C_m$               | 180 mV                                      |
| $f_{43}$         | 20                            | $p_9$                           | $100 \mu\text{M}$                          |                     |                                             |
| $v_{\text{PDH}}$ | $0.4 \mu\text{M ms}^{-1}$     | $p_{10}$                        | 165 mV                                     |                     |                                             |

Table S7. Parameter for the metabolic module.
